# Supplementary material for: Multifunctional B/N/O-co-doped porous spherical carbons to achieve superior capacitive performance with OER activity
Source: Royal Society of Chemistry journal article supplement (doi:10.1039/d4nj02857k), 2024-01-01
Supplement: d4nj02857k1.pdf [file d4nj02857k1.pdf]

## Supplementary Information

### Multifunctional B/N/O-co-doped porous spherical carbons to achieve superior capacitive performance with OER activity

Manjula Pal, Soumitra Bhowmik and Mahasweta Nandi\*

*Integrated Science Education and Research Centre, Siksha Bhavana, Visva-Bharati University,*

*Santiniketan 731 235, India*

*Email: mahasweta.nandi@visva-bharati.ac.in*

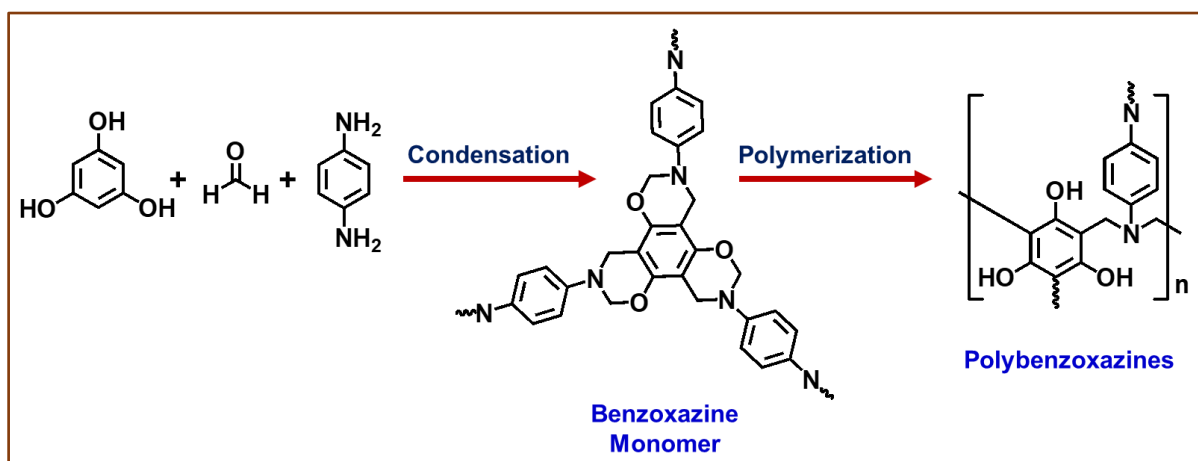

**Scheme S1.** Condensation reaction leading to the formation of **PFP** polymer.

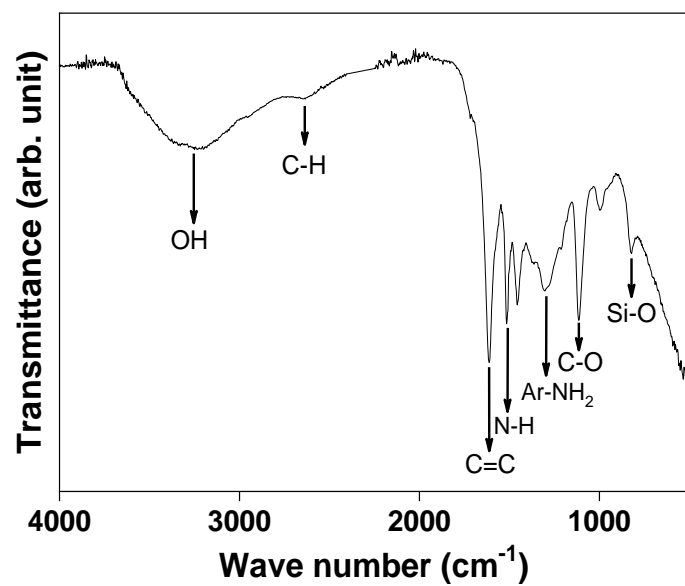

Figure S1. FT-IR spectrum of PFP@Si.

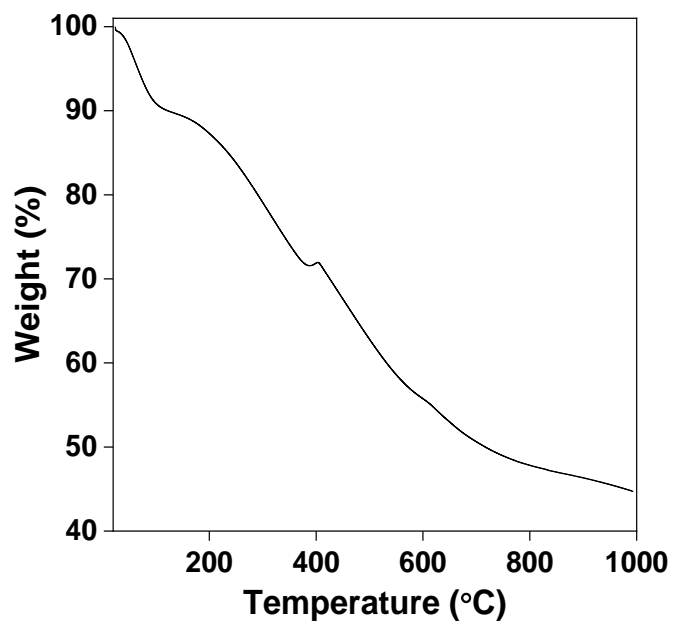

Figure S2. Thermogravimetric analysis of PFP@Si.

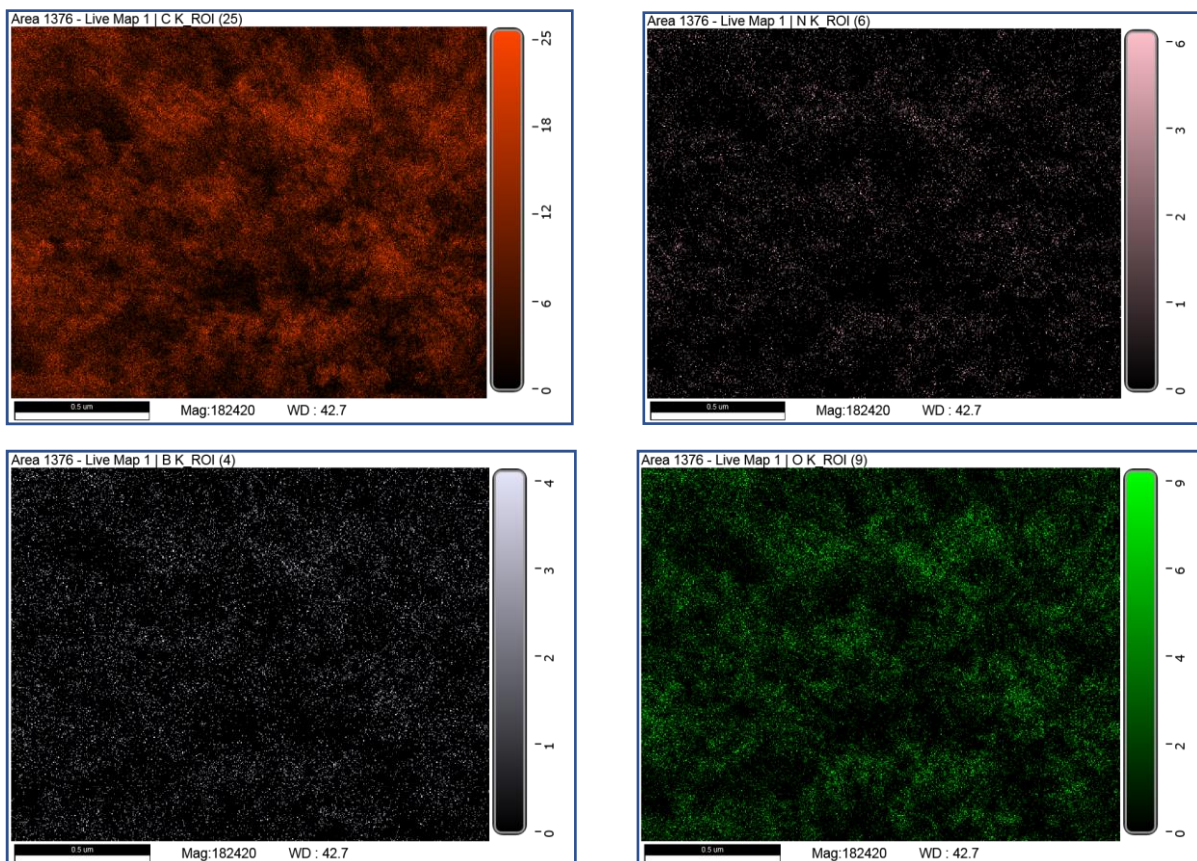

**Figure S3.** Elemental mapping images of CFP-1/1.

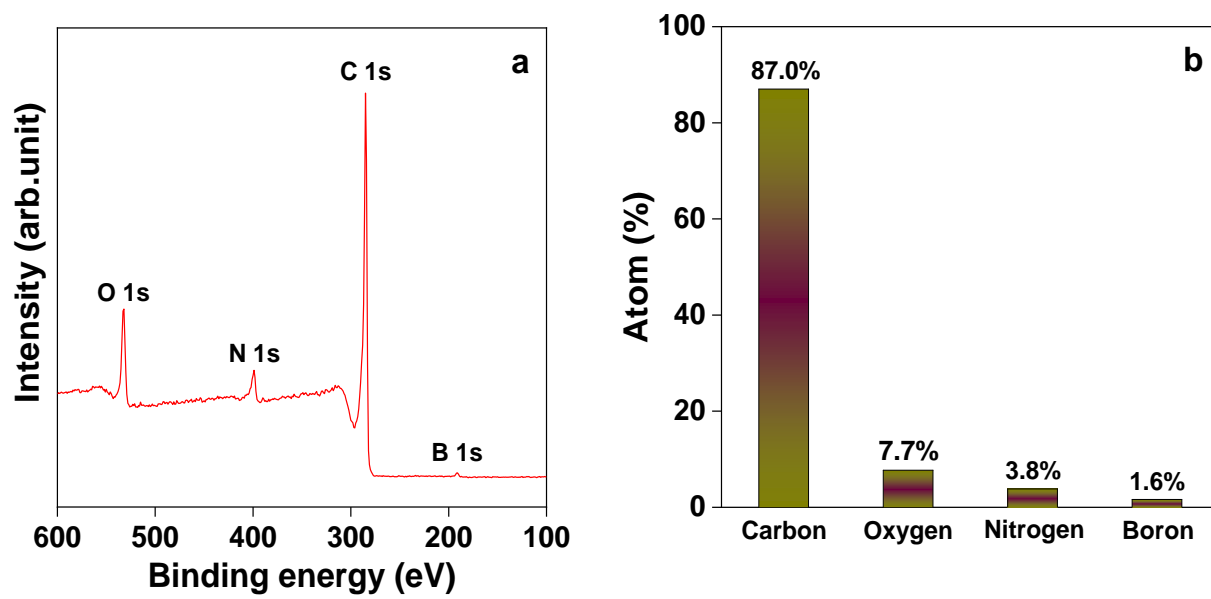

**Figure S4.** (a) XPS survey spectrum of CFP-1/1 and (b) elemental content in percent.

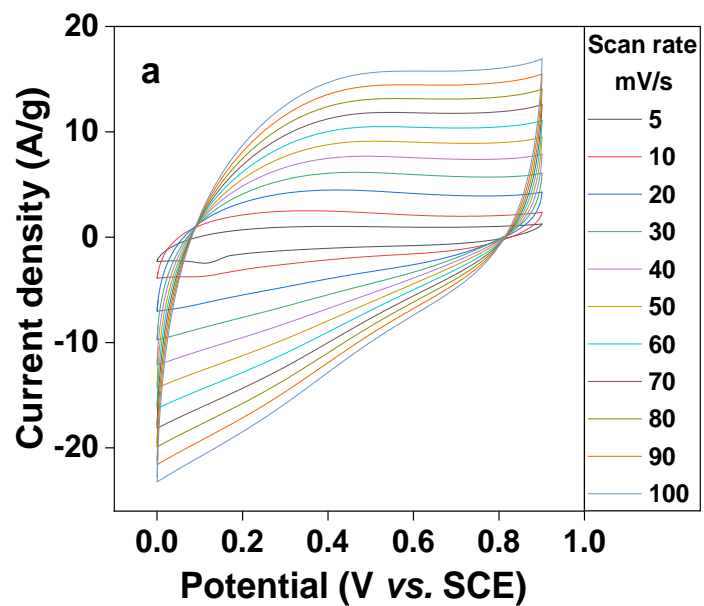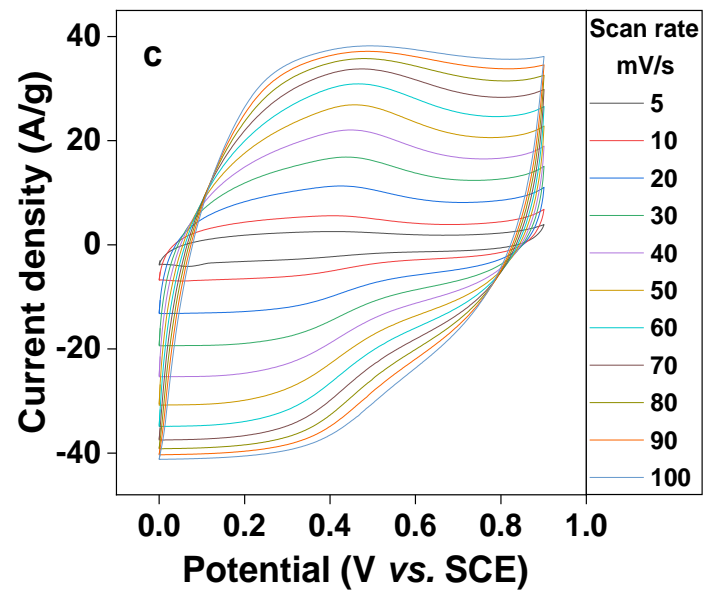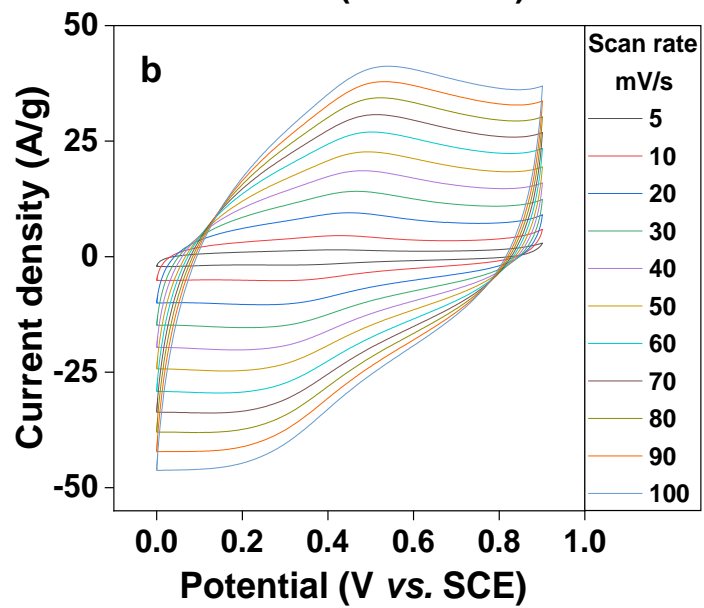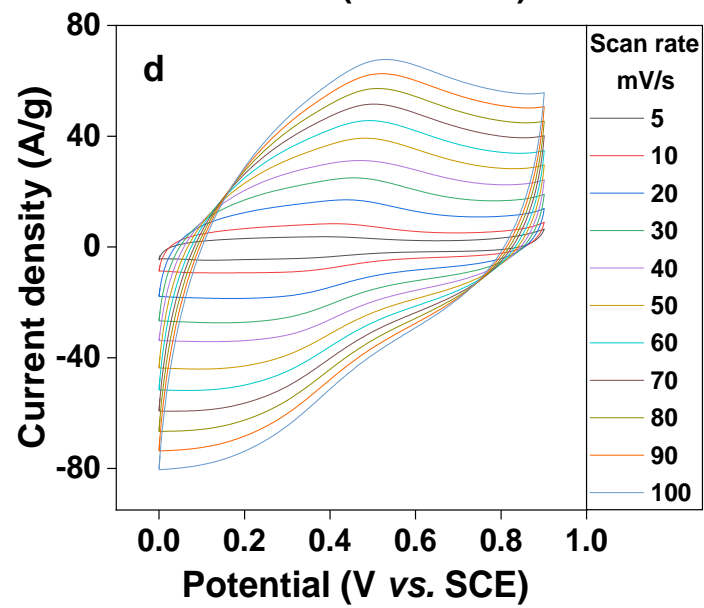

Figure S5. Cyclic voltammograms of (a) CFPF-1/0, (b) CFPF-3/1, (c) CFPF-2/1 and (d) CFPF-1/1 in 1 M H<sub>2</sub>SO<sub>4</sub> at 5 to 100 mV/s scan rate.
